# Supplementary material for: Luteorhabdos pelagi gen. nov., sp. nov., a novel member of the family Flavobacteriaceae, isolated from the West Pacific Ocean
Source: Research Square preprint supplement (doi:10.21203/rs.3.rs-376257/v1), 2021-03-31

**Supplementary materials**

***Luteorhabdos pelagi* gen. nov., sp. nov., a novel member of the family *Flavobacteriaceae*, isolated from the West Pacific Ocean**

Wen-Ting Ren1,2, Fan-Xu Meng1, Li-Li Guo1,3, Li Sun4, Xue-Wei Xu1,2, Peng Zhou1,*, Yue-Hong Wu1,2,*

1Key Laboratory of Marine Ecosystem Dynamics, Ministry of Natural Resources & Second Institute of Oceanography, Ministry of Natural Resources, Hangzhou 310012, PR China

2School of Oceanography, Shanghai Jiao Tong University, Shanghai 200240, PR China

3College of Life and Environmental Science, Hunan University of Arts and Science, Changde 415000, PR China

4State Research Center of Island Exploitation and Management & Second Institute of Oceanography, Ministry of Natural Resources, Hangzhou 310012, PR China

*Corresponding authors: yuehongwu@sio.org.cn; hockeyextremophiles@yahoo.com.

**Supplementary Table S1** Genomic features of A3-108T and its reference strains.

Strains/species: 1, strain A3-108T; 2, *Marinirhabdus gelatinilytica* NH83T; 3, *Galbibacter mesophilus* CGMCC 1.15663T; 4, *Marixanthomonas ophiurae* JCM 14121T.

|  | 1 | 2 | 3 | 4 |
| --- | --- | --- | --- | --- |
| Size (Mb) | 3.40 | 3.29 | 3.77 | 3.30 |
| Contigs | 99 | 24 | 10 | 6 |
| G+C (%) | 41.0 | 41.3 | 37.3 | 35.9 |
| Coding genes | 3250 | 3146 | 3362 | 3097 |
| Protein | 3208 | 3111 | 3318 | 3060 |
| rRNA | 5 | 2 | 3 | 1 |
| tRNA | 37 | 33 | 41 | 36 |
| Accession | JAECMS01 | QRAO01 | JAERQH01 | QVID01 |

**Supplementary** **Table S2** The ANI, DDH and AAI values among the genomes of strain A3-108T with the reference strains.

|  | ANIb | OrthoANI | *in silico* DDH | AAI | Accession number |
| --- | --- | --- | --- | --- | --- |
| 1, strain A3-108T | / | / | / | / | JAECMS01 |
| 2, *Marinirhabdus gelatinilytica* NH83T | 69.5 | 70.1 | 22.1 | 68.0 | QRAO01 |
| 3, *Galbibacter mesophilus* CGMCC 1.15663T | 67.3 | 67.7 | 18.7 | 58.8 | JAERQH01 |
| 4, *Marixanthomonas ophiurae* JCM 14121T | 71.1 | 71.5 | 18.9 | 71.4 | QVID01 |

**Supplementary Fig. S1.** Transmission electron micrographs showing the cell morphology and ultrastructure of strain A3-108T (a and b). Bars, 0.2 μm (a) and 0.5 μm (b).


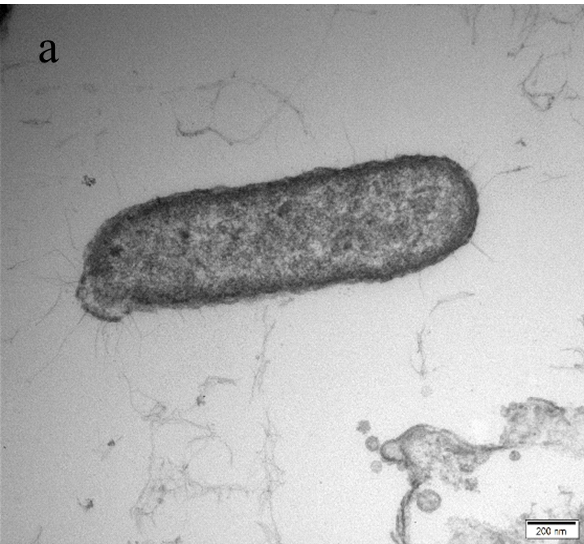

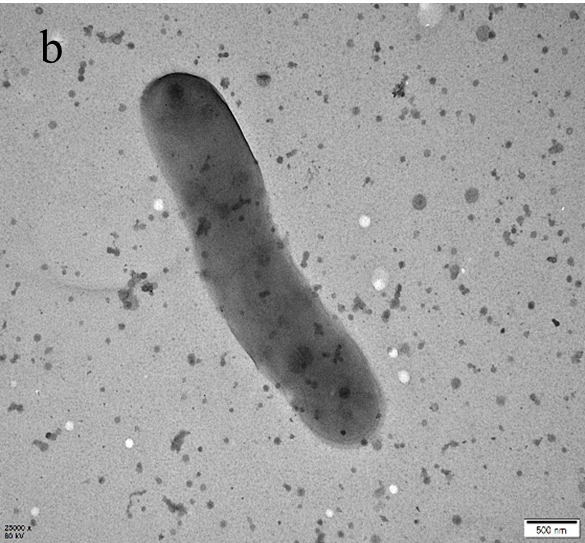


**Supplementary Fig. S2.** The growth curve of strain A3-18T (a) and the curve of log10(OD600) (b), showing that the lag phase, the exponential and the stationary phases were 0-16 h, 16-40 h and exceed 40 h, respectively. On the basis of formulas, the doubling time and specific growth rate for strain A3-108T were 6.2 h and 0.16 h-1, respectively. Doubling time (*td*/h) = ln2/*k*; *k* represents relative growth rate (slope of the curve); specific growth rate (*μ*/h-1) = 1/*td*.


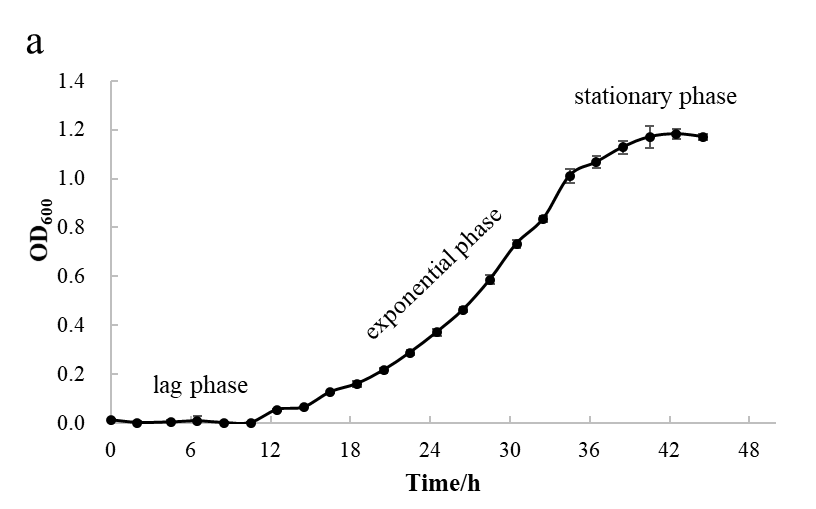

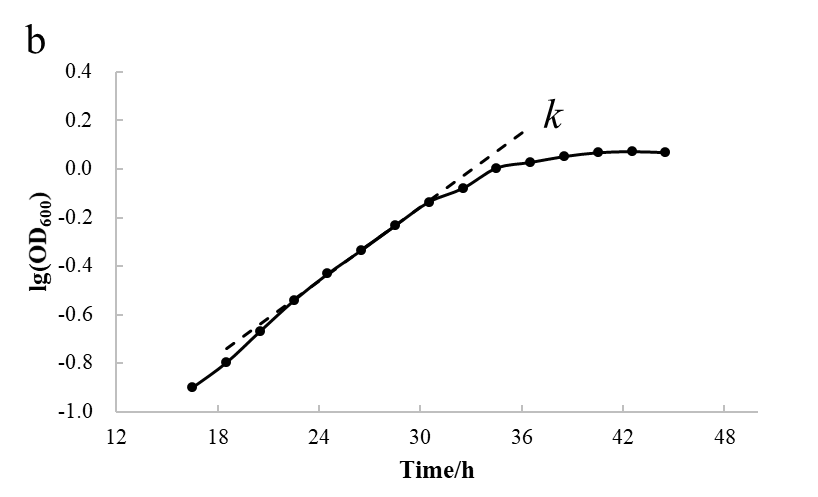


**Supplementary Fig. S3.** Absorption profiles of carotenoids produced by strain A3-108T. UV-visible absorption spectrum of crude extract indicate strain A3-108T comprised carotenoids through typical absorption peaks around 470 nm detection wavelength.


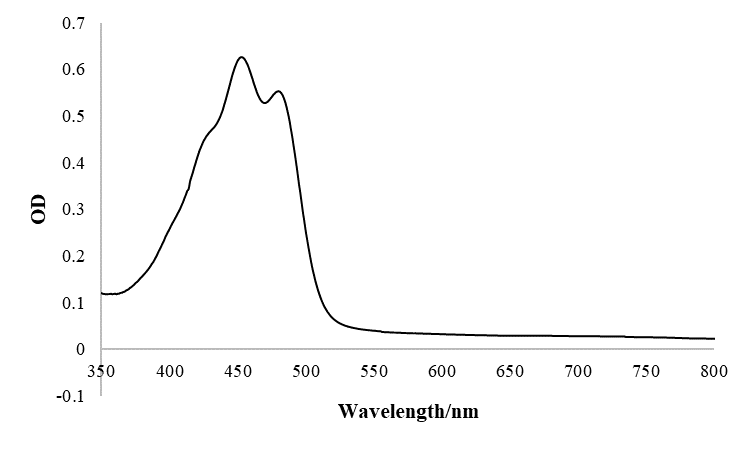


**Supplementary Fig. S4.** Thin-layer chromatograms of strain A3-108T after staining with molybdatophosphoric acid, molybdenum blue reagent, ninhydrin reagent and α-naphthol reagent (a-d). APL, aminophospholipid; AGL, aminoglycolipid; PE, phosphatidylethanolamine; AL, aminolipid; GL, glycolipid; L, lipid.


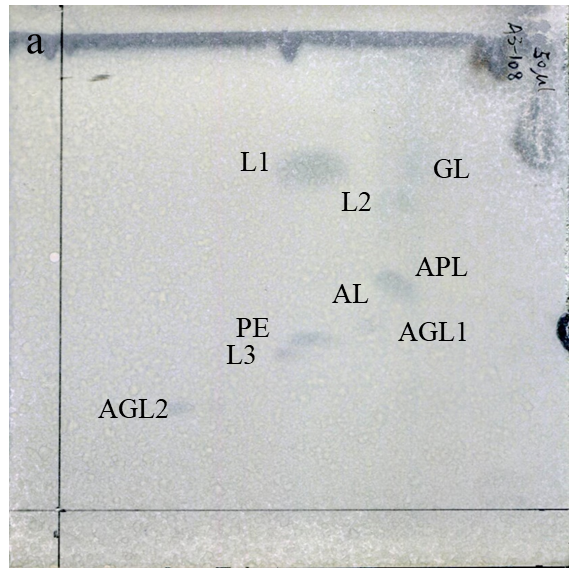

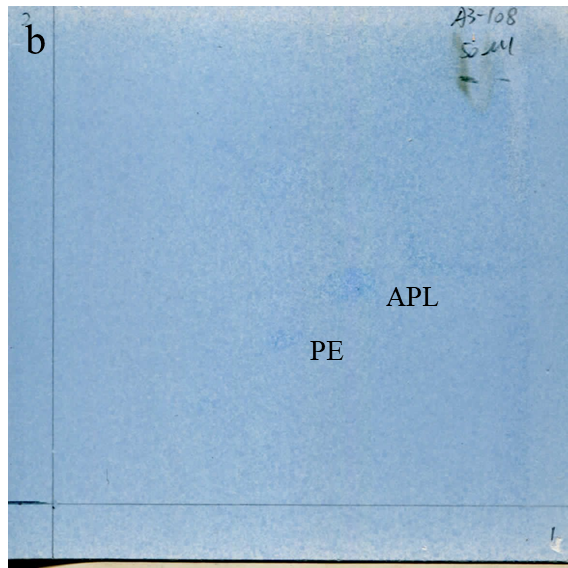

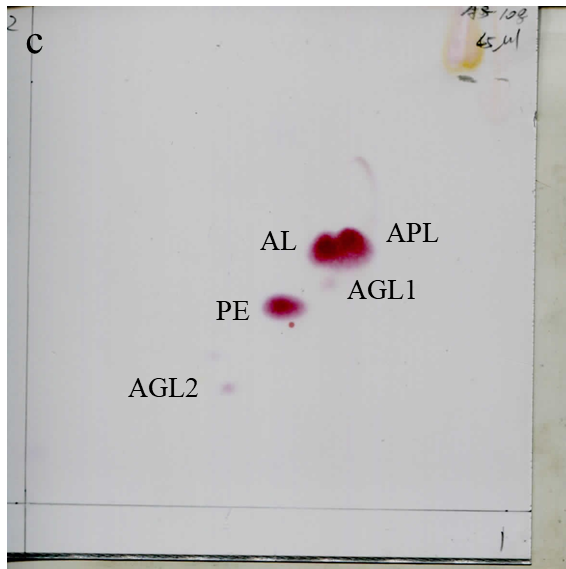

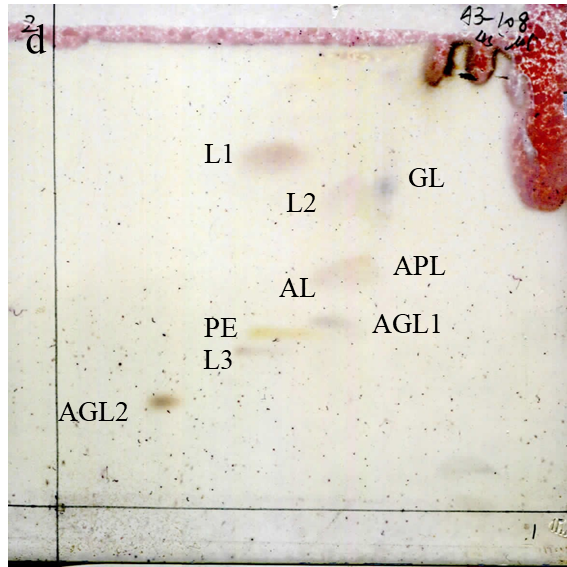

Supplement: Supplementary file 1 [file 1460b8ad06c3ce415c60babb.docx]
